# Supplementary material
Source: PubMed Central journal article supplement (PMC2703602)
Supplement: me.2008-0262_6.pdf [file me.2008-0262_6.pdf]

**Coordinate regulation of estrogen-mediated fibronectin matrix assembly and epidermal growth factor receptor transactivation by the G-protein-coupled receptor, GPR30**

Jeffrey A. Quinn, C. Thomas Graeber, A. Raymond Frackelton Jr, Minsoo Kim, Jean E. Schwarzbauer, and Edward J. Filardo

Please note the following acknowledgments for this manuscript:

This work was supported by a Research Scholar Award (EJF) from the American Cancer Society (RSG-02-194-01) and by NIH award (EJF) CA119165-01A2.
