# Supplementary material
Source: PubMed Central journal article supplement (PMC2703602)

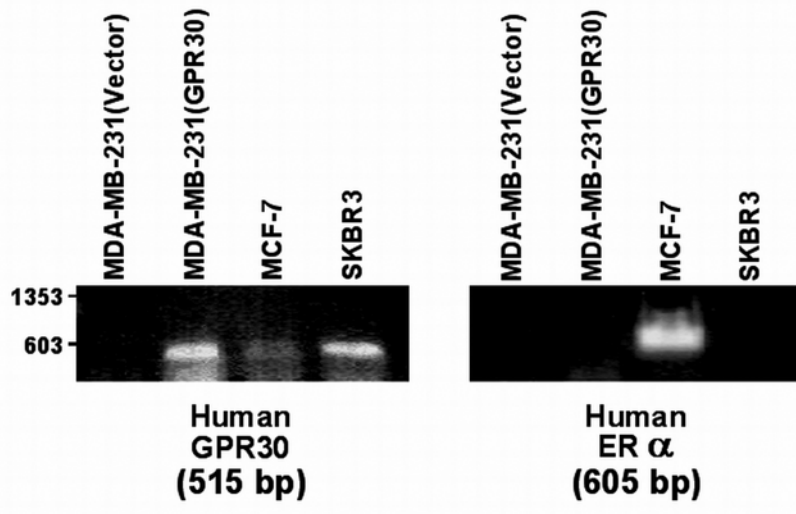

Sup. Figure 1

Supplement: me.2008-0262_2.pdf [file me.2008-0262_2.pdf]

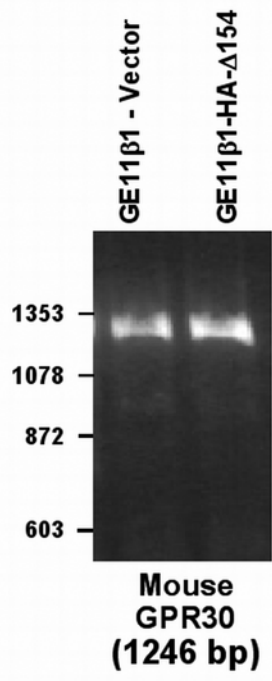

Sup. Figure 2

Supplement: me.2008-0262_3.pdf [file me.2008-0262_3.pdf]

**A**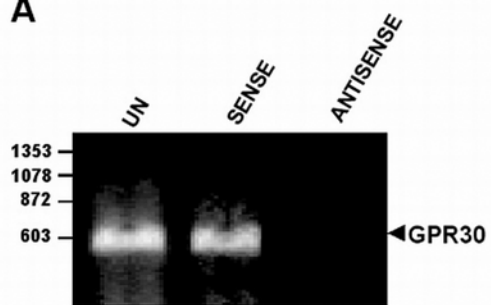**B**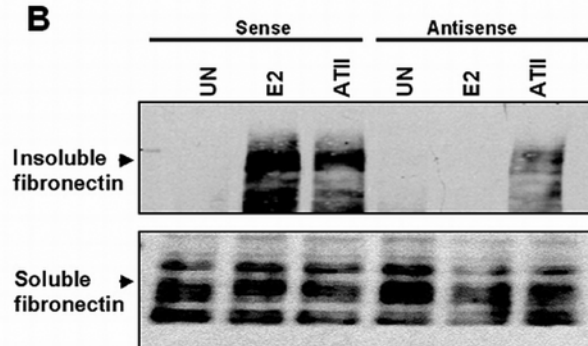**Sup. Figure 3**

Supplement: me.2008-0262_4.pdf [file me.2008-0262_4.pdf]

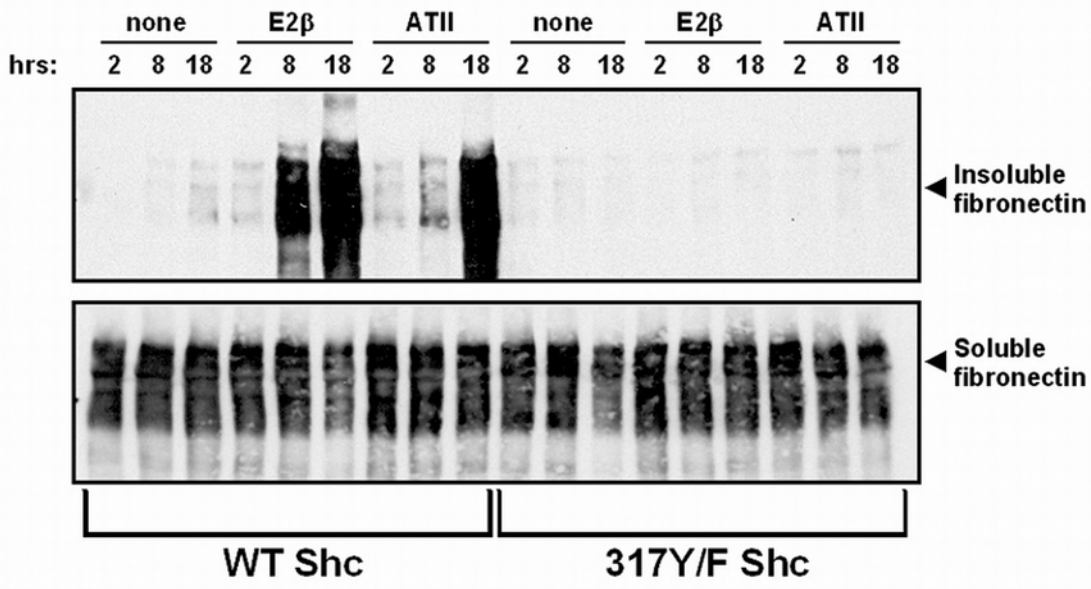

Sup. Figure 4

Supplement: me.2008-0262_5.pdf [file me.2008-0262_5.pdf]
